# Supplementary material for: Randomized Phase II and Biomarker Study of Pembrolizumab plus Bevacizumab versus Pembrolizumab Alone for Patients with Recurrent Glioblastoma
Source: Oxford University Press journal article supplement (doi:10.1158/1078-0432.ccr-20-2500), 2020-11-16
Supplement: 10780432ccr202500-sup-246107_3_supp_6654949_q4bdb0.docx [file 10780432ccr202500-sup-246107_3_supp_6654949_q4bdb0.docx]

**Supplemental Table 1.** Baseline and posttreatment plasma biomarker concentration changes by treatment cohort.

| **Biomarker (pg/ml)** | **Cohort A** | | **Cohort B** | |
| --- | --- | --- | --- | --- |
| **Baseline (n=33)** | **Day 84 (n=18)** | **Baseline (n=19)** | **Day 84 (n=5)** |
| **Ang-2** | 2,145  (1,641, 2,422) | 1,537  (1,217, 2,561) | 1,838  (1,546, 2,481) | 2,328  (1,539, 3,428) |
| P value | 0.00037 | | 0.88 | |
| **sVEGFR1** | 65.8  (56.9, 78.0) | 66.8  (56.8, 90.8) | 66.5  (57.2, 86.3) | 77.0  (66.4, 82.8) |
| P value | 0.90 | | 0.88 | |
| **PlGF** | 8.6  (7.8, 9.5) | 17.6  (14.0, 22.1) | 9.1  (7.6, 10.3) | 9.0  (6.8, 9.5) |
| P value | 0.00012 | | 1.0 | |
| **sTIE2** | 4,255  (3,814, 5,124) | 4,746  (3,843, 5,439) | 4,657  (3,835, 4,888) | 4,641  (3,859, 5,013) |
| P value | 0.67 | | 0.88 | |
| **VEGF** | 106.9  (81.1, 128.8) | 49.0  (49.0, 57.5) | 81.6  (59.1, 97.2) | 74.6  (68.7, 75.4) |
| P value | 0.00012 | | 0.88 | |
| **VEGF-C** | 59.2  (57.0, 96.2) | 66.5  (57.0, 80.1) | 57.0  (57.0, 74.2) | 57.0  (57.0, 57.0) |
| P value | 0.91 | | 1.0 | |
